# Supplementary material for: The effects of Solidago canadensis water extracts on maize seedling growth in association with the biomass allocation pattern
Source: PeerJ. 2019 Mar 12;7:e6564. doi: 10.7717/peerj.6564 (PMC6419718; doi:10.7717/peerj.6564)
Supplement: Supplemental Information 1 [file peerj-07-6564-s001.xls]

## Sheet: Figure 4
				Pmax (µmol·m-2·s-1)
				Treatment duration (d)	0.000 g/mL	Standard error		0.0125 g/mL	Standard error		0.20 g/mL	Standard error
				0	18.8625	1.9233		18.8625	1.9233		18.8625	1.9233
				1	21.9487	2.3405		21.5753	1.2805		22.556	1.0654
				2	22.9544	0.634		22.9379	1.5475		22.6739	0.8095
				3	19.8275	2.8838		18.9067	1.0769		20.2184	1.1361
				AQE (mol CO2·mol-1photon)
				Treatment duration (d)	0.00 g/mL	Standard error		0.0125 g/mL	Standard error		0.20 g/mL	Standard error
				0	0.0263	0.00203		0.0263	0.00203		0.0263	0.00203
				1	0.0287	0.00145		0.029	0.00153		0.029	0.00173
				2	0.03	0.00115		0.0293	0.00203		0.0297	0.00033
				3	0.026	0.00351		0.0257	0.00145		0.027	0.00153
				Rd (µmol·m-2·s-1)
				Treatment duration (d)	0.00 g/mL	Standard error		0.0125 g/mL	Standard error		0.20 g/mL	Standard error
				0	0.7987	0.1689		0.7987	0.1689		0.7987	0.1689
				1	0.7149	0.1119		0.6043	0.075		0.4158	0.1296
				2	0.3598	0.0692		0.6647	0.0162		0.4063	0.0454
				3	0.4512	0.07		0.5261	0.0923		0.3718	0.0659

## Sheet: Figure 5
							shoot height (cm)		SLA (cm2/g)		LMR (g/g)		LAR (cm2/g)
							8		62.762		0.251676		15.9332
							9.2		53.7373		0.300483		18.6091
							8.5		58.7668		0.311605		17.0164
							8.9		54.363		0.278936		18.3949
							9.5		57.5893		0.324879		17.3643
							9.4		57.6875		0.274033		17.3348
							8.6		64.1178		0.268773		15.5963
							10.1		59.232		0.291282		16.8828
							8.4		55.5481		0.316492		18.0024
							9.6		56.2203		0.302115		17.7872
							9.8		58.6782		0.303644		17.0421
							11.5		62.7339		0.263971		15.9403
							11.6		59.0116		0.282252		16.9458
							9.9		70.4605		0.266337		14.1924
							10		64.5442		0.291395		15.4933
							10.1		61.6575		0.251004		16.2186
							9.6		53.4191		0.279127		18.7199
							9.1		57.4851		0.302613		17.3958
							9.3		52.3327		0.331567		19.1085
							9.2		51.963		0.328269		19.2445
							10		59.7803		0.278097		16.7279
							8.9		50.7564		0.306748		19.7019
							9.6		55.7579		0.266737		17.9347
							9.9		44.4861		0.319456		22.4789
							8.9		62.8337		0.24914		15.915
							9.3		50.8837		0.29476		19.6526
							6.9		51.8652		0.306483		19.2808
							9.3		54.9986		0.280883		18.1823
							8.1		63.234		0.252434		15.8143
							8.8		50.616		0.315425		19.7566
							10		59.5901		0.301633		16.7813
							9.6		56.9357		0.289272		17.5637
							10.8		61.4634		0.303873		16.2698
							9.3		46.2398		0.261635		21.6264
							8.2		59.8939		0.312382		16.6962
							10		60.824		0.279171		16.4409
									58.01		0.291603		17.563
							7.1		47.0602		0.294961		21.2494
							8.1		51.7162		0.258886		19.3363
							6.2		41.1694		0.314681		24.2899
							7.3		56.3945		0.251267		17.7322
							6.3		57.1865		0.329034		17.4866
							6.5		57.1293		0.29627		17.5042
							11.1		54.1227		0.29173		18.4765
							7.1		60.566		0.289312		16.5109
							6.5		52.8121		0.286567		18.9351
							6.7		56.7568		0.309472		17.619
							6.4		49.4826		0.305741		20.2091
							8		70.1442		0.301759		14.2563
							6.3		44.1183		0.305934		22.6663
							6.4		56.9224		0.33989		17.5678
							8.7		51.3249		0.296344		19.4837
							8.7		51.5559		0.278467		19.3964
							8.9		53.3164		0.309925		18.756
							6.4		47.7556		0.278884		20.94
							7.1		50.785		0.296778		19.6909
							8.2		57.6918		0.292696		17.3335
							8.3		56.6353		0.274757		17.6568
							5.1		41.8769		0.291166		23.8795
							5.9		50.9218		0.284399		19.638
							6.5		54.4983		0.285951		18.3492
							8.2		48.0551		0.2652		20.8095
							8		55.0965		0.272847		18.15
							7.8		52.9616		0.261662		18.8816
							6.7		60.8122		0.29461		16.4441
							5		52.895		0.29767		18.9054
							5.2		69.1914		0.217792		14.4527
							8.6		63.4533		0.287972		15.7596
							7		48.5628		0.304437		20.5919
							9.5		54.752		0.262433		18.2642
							6.4		52.5709		0.296021		19.0219
							7		54.3048		0.287714		18.4146
							6.1		30.8269		0.290304		32.4392

## Sheet: Figure 3
				Water extract concentration (g/mL)	LMR (g/g)	Standard error
				0	0.2903	0.01101
				0.0125	0.291	0.00848
				0.025	0.2788	0.00745
				0.05	0.3051	0.01103
				0.075	0.2832	0.01129
				0.1	0.2913	0.00762
				0.125	0.2908	0.01246
				0.15	0.2974	0.00387
				0.175	0.3016	0.00937
				0.2	0.2876	0.00317
				0.225	0.2683	0.0118
				0.25	0.2881	0.00575
				Water extract concentration (g/mL)	SLA (cm2/g)	Standard error
				0	57.4843	1.33334
				0.0125	59.4217	1.40079
				0.025	61.0963	2.42361
				0.05	52.5127	2.09121
				0.075	55.7385	2.39362
				0.1	57.4912	2.33785
				0.125	51.776	2.67086
				0.15	57.3141	2.98487
				0.175	50.8322	1.81264
				0.2	52.0682	2.34671
				0.225	45.502	3.0467
				0.25	50.7451	4.45367
				Water extract concentration (g/mL)	LAR (g/cm2)	Standard error
				0	16.6561	0.60288
				0.0125	17.2203	0.18104
				0.025	17.0022	0.66707
				0.05	15.948	0.51562
				0.075	15.6541	0.1552
				0.1	16.8182	0.56
				0.125	15.0228	0.45
				0.15	17.051	0.93783
				0.175	15.3756	0.92953
				0.2	14.963	0.64178
				0.225	15.0609	0.71727
				0.25	14.5935	0.72

## Sheet: Figure 2
			Water extract concentration (g/mL)	Leaf biomass (g)	Standard error
			0	0.6246	0.06431
			0.0125	0.73	0.06971
			0.025	0.6732	0.04691
			0.05	0.736	0.06288
			0.075	0.6456	0.07148
			0.1	0.6581	0.04057
			0.125	0.5432	0.06371
			0.15	0.602	0.11233
			0.175	0.5846	0.06068
			0.2	0.5562	0.05895
			0.225	0.4486	0.05205
			0.25	0.5515	0.05635
			Water extract concentration (g/mL)	Stem biomass (g)	Standard error
			0	0.6127	0.06443
			0.0125	0.6843	0.0743
			0.025	0.7281	0.05649
			0.05	0.6573	0.04259
			0.075	0.5747	0.05571
			0.1	0.6186	0.0386
			0.125	0.5111	0.04816
			0.15	0.5659	0.10427
			0.175	0.5039	0.0687
			0.2	0.4871	0.05484
			0.225	0.473	0.0656
			0.25	0.5167	0.05125
			Water extract concentration (g/mL)	Root biomass (g)	Standard error
			0	0.9014	0.07338
			0.0125	1.0862	0.07894
			0.025	1.0066	0.0494
			0.05	1.0105	0.06528
			0.075	1.043	0.07526
			0.1	0.9802	0.05022
			0.125	0.8134	0.09745
			0.15	0.8697	0.09
			0.175	0.8655	0.09646
			0.2	0.8916	0.09352
			0.225	0.7364	0.07646
			0.25	0.859	0.12183
			Water extract concentration (g/mL)	Whole plant biomass (g)	Standard error
			0	2.1387	0.18045
			0.0125	2.5005	0.21381
			0.025	2.4079	0.13367
			0.05	2.4038	0.15414
			0.075	2.2633	0.19195
			0.1	2.257	0.118
			0.125	1.8676	0.19841
			0.15	2.0376	0.19406
			0.175	1.9539	0.21568
			0.2	1.9348	0.20435
			0.225	1.658	0.17592
			0.25	1.9272	0.22085

## Sheet: Figure 1
		Water extract concentration (g/mL)	Plant height (cm)	Standard error
		0	8.9167	0.23582
		0.0125	9.5667	0.39129
		0.025	10.05	0.34327
		0.05	9.4833	0.17401
		0.075	8.55	0.37572
		0.1	9.5167	0.288
		0.125	6.9167	0.29712
		0.15	7.6333	0.73288
		0.175	7.5667	0.53769
		0.2	6.85	0.51881
		0.225	6.8167	0.58333
		0.25	7.4333	0.54324
		Water extract concentration (g/mL)	Total leaf length (cm)	Standard error
		0	53.335	3.06492
		0.0125	59.2817	3.99837
		0.025	59.9267	1.92678
		0.05	58.1	2.96978
		0.075	63.384	2.63431
		0.1	62.4417	2.23335
		0.125	54.73	5.57067
		0.15	54.36	6.04148
		0.175	52.46	4.90885
		0.2	48.195	5.5919
		0.225	42.7583	2.95744
		0.25	44.85	5.03139
		Water extract concentration (g/mL)	Total leaf area (cm2)	Standard error
		0	35.675	3.41919
		0.0125	43.0817	3.77704
		0.025	41.0017	2.8631
		0.05	38.38	3.04347
		0.075	35.4	3.00004
		0.1	38.1783	3.48557
		0.125	28.6817	4.4382
		0.15	33.8167	5.83556
		0.175	29.8517	3.47364
		0.2	29.5217	3.96473
		0.225	24.6733	2.26605
		0.25	28.8367	4.79837
		Water extract concentration (g/mL)	Total root length (cm)	Standard error
		0	284.542	33.8377
		0.0125	368.1	17.2359
		0.025	352.918	26.2985
		0.05	311.643	17.6151
		0.075	326.31	33.2202
		0.1	334.195	38.6674
		0.125	190.503	35.1768
		0.15	240.763	64.9402
		0.175	172.997	38.1308
		0.2	174.6	31.9654
		0.225	143.802	44.7542
		0.25	210.983	52.0783
